# Supplementary material for: Enhanced Adipose Expression of Interferon Regulatory Factor (IRF)-5 Associates with the Signatures of Metabolic Inflammation in Diabetic Obese Patients
Source: PubMed Central journal article supplement (PMC7140673; doi:10.3390/cells9030730), 2020-03-16
Supplement: cells-09-00730-s001.pdf [file cells-09-00730-s001.pdf]

**Table S1. Primer IDs**

| <b>Immune marker</b> | <b>Primer ID</b> |
|----------------------|------------------|
| TNF- $\alpha$        | Hs01113624_g1    |
| IL-1 $\beta$         | Hs01555410_m1    |
| IL-6                 | Hs00985639_m1    |
| IL-18                | Hs01038788_m1    |
| IL-23A               | Hs00900828_g1    |
| CXCL8 (IL-8)         | Hs00174103_m1    |
| CXCL9                | Hs00171065_m1    |
| CXCL10 (IP-10)       | Hs01124251_g1    |
| CCL2 (MCP-1)         | Hs00234140_m1    |
| CCL5 (RANTES)        | Hs00982282_m1    |
| CCL7 (MCP-3)         | Hs00171147_m1    |
| CCL11                | Hs00237013_m1    |
| CCL19                | Hs00171149_m1    |
| CCR1                 | Hs00928897_s1    |
| CCR2                 | Hs00704702_s1    |
| CCR5                 | Hs99999149_s1    |
| TLR2                 | Hs01872448_s1    |
| TLR3                 | Hs01551078_m1    |
| TLR4                 | Hs00152939_m1    |
| TLR7                 | Hs01933259_s1    |
| TLR8                 | Hs00152972_m1    |
| TLR9                 | Hs00370913_s1    |
| TLR10                | Hs01935337_s1    |
| Dectin-1             | Hs01902549_s1    |
| IL-1RL1              | Hs00545033_m1    |
| FGL-2                | Hs00173847_m1    |
| CD11c                | Hs00174217_m1    |
| CD68                 | Hs02836816_g1    |
| CD86                 | Hs01567026_m1    |
| CD163                | Hs00174705_m1    |
| CD302                | Hs00994886_m1    |
| MyD88                | Hs01573837_g1    |
| NF- $\kappa$ B       | Hs00765730_m1    |
| IRF3                 | Hs01547283_m1    |
| IRF4                 | Hs01056533_m1    |
| IRF5                 | Hs00158114_m1    |
| AML1 (RUNX1)         | Hs00257856_s1    |
| GAPDH                | Hs03929097_g1    |
